# Supplementary material for: Dynamically expressed single ELAV/Hu orthologue elavl2 of bees is required for learning and memory
Source: PubMed Central journal article supplement (PMC8553928; doi:10.1038/s42003-021-02763-1), 2021-10-28
Supplement: 42003_2021_2763_MOESM4_ESM.pdf [file 42003_2021_2763_MOESM4_ESM.pdf]

## Description of Additional Supplementary Files

**File name:** Supplementary Data 1.

**Description:** Source data and uncropped gels/blots.
